# Supplementary figures and images for: Exogenous Application of Glycine Betaine on Sweet Cherry Tree (Prunus avium L.): Effects on Tree Physiology and Leaf Properties
Source: MDPI journal article supplement (doi:10.3390/plants11243470), 2022-12-11

## Supplementary Materials

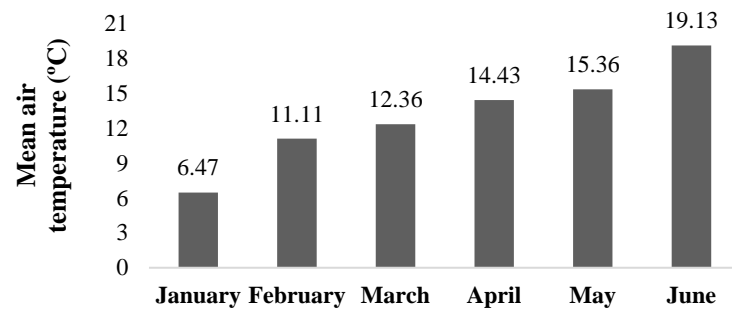

**Figure S1.** Mean air temperature (°C) from January to June of 2021.

Supplement: s1 [file s1]
